# Supplementary material for: Contamination-resistant silica antireflective coating with closed ordered mesopores
Source: Royal Society of Chemistry journal article supplement (doi:10.1039/c4cp01032a), 2014-01-01
Supplement: c4cp01032a1.pdf [file c4cp01032a1.pdf]

## Supporting Information

### Title: Contamination-Resistant Silica Antireflective Coating with Closed Ordered Mesopores

Jinghua Sun, Qinghua Zhang, Ruimin Ding, Haibing Lv, Hongwei Yan, Xiaodong Yuan\*, and Yao Xu\*

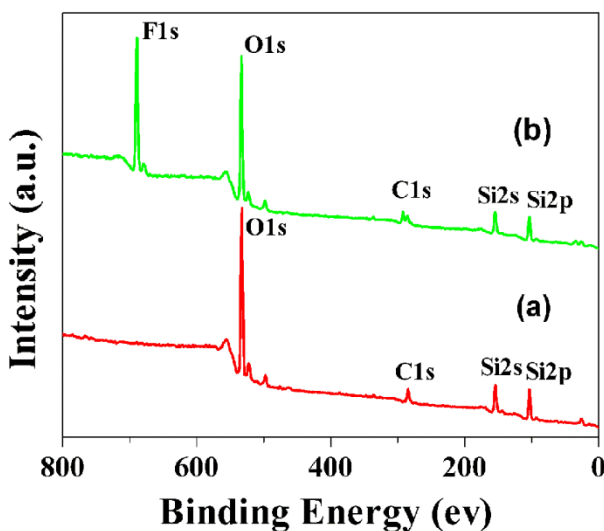

**Fig. S1** XPS survey spectra of mesoporous silica coatings before and after fluoroalkyl-grafting (a) F07N and (b) F07NF.

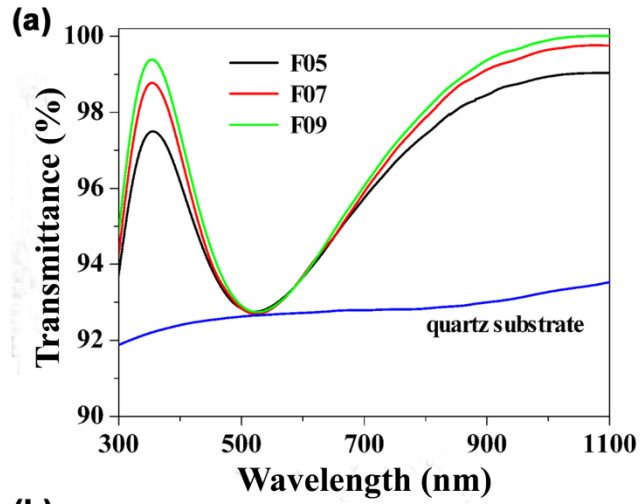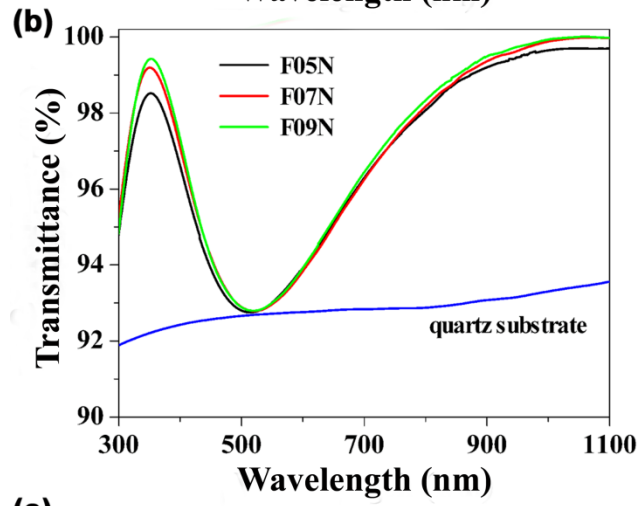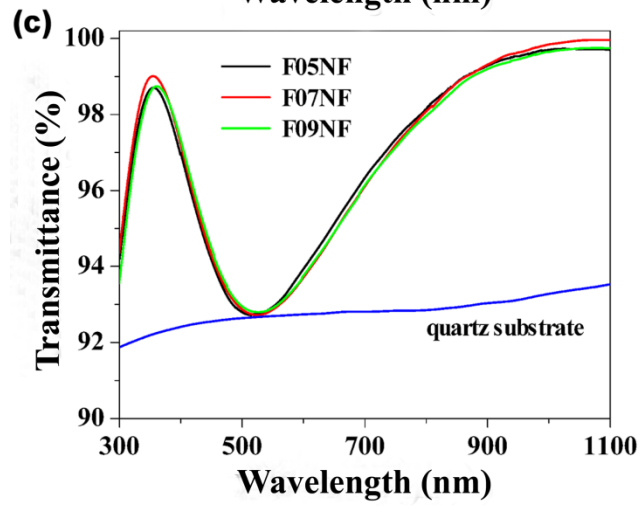

**Fig. S2** Transmission spectra of ordered mesoporous silica antireflective coatings with various surfactant content (a) un-treatment and (b) ammonia vapor treatment and (c) fluoroalkyl-grafting.
